# Supplementary material for: A Brain Tumor Image Segmentation Method Based on Quantum Entanglement and Wormhole Behaved Particle Swarm Optimization
Source: PubMed Central journal article supplement (PMC9127532; doi:10.3389/fmed.2022.794126), 2022-05-10
Supplement: Table_1.pdf [file Table_1.pdf]

| Symbol    | Equation                                                                                                                                                                                                                                                                                   | Explanation                                                                         |
|-----------|--------------------------------------------------------------------------------------------------------------------------------------------------------------------------------------------------------------------------------------------------------------------------------------------|-------------------------------------------------------------------------------------|
| $c$       | $ds^2 = -c^2 dt^2 + \frac{dr^2}{1 - \frac{b_0^2}{r^2}} + r^2(d\theta^2 + \sin^2 \theta d\varphi^2) \quad (1)$                                                                                                                                                                              | the speed of light                                                                  |
| $\theta$  | $ds^2 = -c^2 dt^2 + \frac{dr^2}{1 - \frac{b_0^2}{r^2}} + r^2(d\theta^2 + \sin^2 \theta d\varphi^2) \quad (1)$                                                                                                                                                                              | the zenith angle between positive z-axis                                            |
| $r$       | $ds^2 = -c^2 dt^2 + \frac{dr^2}{1 - \frac{b_0^2}{r^2}} + r^2(d\theta^2 + \sin^2 \theta d\varphi^2) \quad (1)$ $ds^2 = \frac{dr^2}{1 - \frac{b_0^2}{r^2}} + r^2 d\varphi^2 \quad (2)$ $z(r) = \pm b_0 \ln \left[ \frac{r}{b_0} + \sqrt{\left(\frac{r}{b_0}\right)^2 - 1} \right] \quad (3)$ | the radius of the throat part of the wormhole.                                      |
| $\varphi$ | $ds^2 = -c^2 dt^2 + \frac{dr^2}{1 - \frac{b_0^2}{r^2}} + r^2(d\theta^2 + \sin^2 \theta d\varphi^2) \quad (1)$ $ds^2 = \frac{dr^2}{1 - \frac{b_0^2}{r^2}} + r^2 d\varphi^2 \quad (2)$                                                                                                       | the azimuth angle between positive X-axis in spherical coordinate system            |
| $b_0$     | $ds^2 = -c^2 dt^2 + \frac{dr^2}{1 - \frac{b_0^2}{r^2}} + r^2(d\theta^2 + \sin^2 \theta d\varphi^2) \quad (1)$ $ds^2 = \frac{dr^2}{1 - \frac{b_0^2}{r^2}} + r^2 d\varphi^2 \quad (2)$ $z(r) = \pm b_0 \ln \left[ \frac{r}{b_0} + \sqrt{\left(\frac{r}{b_0}\right)^2 - 1} \right] \quad (3)$ | $b_0=2GM$ , where M is the object's mass, G is the universal gravitational constant |

---


$$z(r) = \pm b_0 \ln(a) \quad (4)$$

$$z(r) \quad z(r) = \pm b_0 \ln(a) \quad (4)$$

the spatial shape of the entire hyperboloid obtained by rotating numerous radius lines

$$r, r' \quad x(r) = r + r' + \left(\frac{2}{\zeta}\right) \ln\left(\frac{\Delta\theta}{2}\right) \quad (5)$$

$$x = r + r' + \left(\frac{2}{\zeta}\right) \ln\left(\frac{\Delta\theta}{2}\right) \quad (13)$$

Two particle positions of radiuses at a distance from the disc center

$$\zeta \quad x(r) = r + r' + \left(\frac{2}{\zeta}\right) \ln\left(\frac{\Delta\theta}{2}\right) \quad (5)$$

$$x = r + r' + \left(\frac{2}{\zeta}\right) \ln\left(\frac{\Delta\theta}{2}\right) \quad (13)$$

the distance coefficient

$$X_{iw} = P_{id} \pm \left(\frac{2}{\zeta}\right) \ln\left(\frac{\Delta\theta}{2}\right) \quad (15)$$

$$x(t+1) = P(t) - \left(\frac{2}{\zeta}\right) \cdot |M_{best} - x(t)| \cdot \ln\left(\frac{\Delta\theta}{2}\right) \quad (16)$$

$$x(t+1) = P(t) + (2/\zeta) \cdot |M_{best} - x(t)| \cdot \ln\left(\frac{\Delta\theta}{2}\right) \quad (17)$$

$$\Delta\theta \quad x(r) = r + r' + \left(\frac{2}{\zeta}\right) \ln\left(\frac{\Delta\theta}{2}\right) \quad (5)$$

$$x = r + r' + \left(\frac{2}{\zeta}\right) \ln\left(\frac{\Delta\theta}{2}\right) \quad (13)$$

The range of  $\Delta\theta$  is:  $0 < \Delta\theta < 57.32$

$$X_{iw} = P_{id} \pm \left(\frac{2}{\zeta}\right) \ln\left(\frac{\Delta\theta}{2}\right) \quad (15)$$

$$x(t+1) = P(t) - \left(\frac{2}{\zeta}\right) \cdot |M_{best} - x(t)| \cdot \ln\left(\frac{\Delta\theta}{2}\right) \quad (16)$$


---

---


$$x(t+1) = P(t) + (2/\zeta) \cdot |Mbest - x(t)| \cdot \ln\left(\frac{\Delta\theta}{2}\right) \quad (17)$$

|                |                                                                                                   |                                                                                                                         |
|----------------|---------------------------------------------------------------------------------------------------|-------------------------------------------------------------------------------------------------------------------------|
| $Q(y_{id})$    | $Q(y_{id}) =  \psi(y_{id}) ^2 = \frac{1}{L} e^{-2 y_{id} /L} \quad (6)$                           | the location of a particle probabilistically                                                                            |
| $\psi(y_{id})$ | $Q(y_{id}) =  \psi(y_{id}) ^2 = \frac{1}{L} e^{-2 y_{id} /L} \quad (6)$                           | the spin field operator                                                                                                 |
| $L$            | $Q(y_{id}) =  \psi(y_{id}) ^2 = \frac{1}{L} e^{-2 y_{id} /L} \quad (6)$                           | the characteristic length of the potential well                                                                         |
| $s$            | $s = \frac{1}{L} rand(0,1) = \frac{1}{L} u, \text{ and } u = rand(0,1) \quad (7)$                 | is a lucky number within the range of $(0, 1/L)$                                                                        |
| $u$            | $s = \frac{1}{L} rand(0,1) = \frac{1}{L} u, \text{ and } u = rand(0,1) \quad (7)$                 | the random value between 0 and 1 that represents the arbitrary distance between particles in the quantum potential well |
| $P$            | $P = \frac{(\varphi_1 \times P_{id} + \varphi_2 \times P_{gd})}{\varphi_1 + \varphi_2} \quad (9)$ | the particles coordinates                                                                                               |

$$x(t+1) = P - \alpha \cdot |Mbest - x(t)| \cdot \ln\left(\frac{1}{\mu}\right) \quad (11)$$

$$x(t+1) = P + \alpha \cdot |Mbest - x(t)| \cdot \ln\left(\frac{1}{\mu}\right) \quad (12)$$

$$x(t+1) = P(t) - \left(\frac{2}{\zeta}\right) \cdot |Mbest - x(t)| \cdot \ln\left(\frac{\Delta\theta}{2}\right) \quad (16)$$

$$x(t+1) = P(t) + (2/\zeta) \cdot |Mbest - x(t)| \cdot \ln\left(\frac{\Delta\theta}{2}\right) \quad (17)$$

|             |                                                                                                   |                         |
|-------------|---------------------------------------------------------------------------------------------------|-------------------------|
| $\varphi_1$ | $P = \frac{(\varphi_1 \times P_{id} + \varphi_2 \times P_{gd})}{\varphi_1 + \varphi_2} \quad (9)$ | $\varphi_1 = rand(0,1)$ |
|-------------|---------------------------------------------------------------------------------------------------|-------------------------|

---

---

|             |                                                                                                   |                                |
|-------------|---------------------------------------------------------------------------------------------------|--------------------------------|
| $\varphi_2$ | $P = \frac{(\varphi_1 \times P_{id} + \varphi_2 \times P_{gd})}{\varphi_1 + \varphi_2} \quad (9)$ | $\varphi_2 = \text{rand}(0,1)$ |
|-------------|---------------------------------------------------------------------------------------------------|--------------------------------|

|          |                                                                                                   |                                   |
|----------|---------------------------------------------------------------------------------------------------|-----------------------------------|
| $P_{id}$ | $P = \frac{(\varphi_1 \times P_{id} + \varphi_2 \times P_{gd})}{\varphi_1 + \varphi_2} \quad (9)$ | the best position of the particle |
|----------|---------------------------------------------------------------------------------------------------|-----------------------------------|

$$X_{iw} = P_{id} \pm \left(\frac{2}{\zeta}\right) \ln\left(\frac{\Delta\theta}{2}\right) \quad (15)$$

|          |                                                                                                   |                                            |
|----------|---------------------------------------------------------------------------------------------------|--------------------------------------------|
| $P_{gd}$ | $P = \frac{(\varphi_1 \times P_{id} + \varphi_2 \times P_{gd})}{\varphi_1 + \varphi_2} \quad (9)$ | the global best position of the population |
|----------|---------------------------------------------------------------------------------------------------|--------------------------------------------|

|            |                                          |                        |
|------------|------------------------------------------|------------------------|
| $M_{best}$ | $M_{best} = \frac{\sum_{i=1}^M P(t)}{M}$ | the mean best position |
|------------|------------------------------------------|------------------------|

$$x(t+1) = P - \alpha \cdot |M_{best} - x(t)| \cdot \ln\left(\frac{1}{\mu}\right) \quad (11)$$

$$x(t+1) = P + \alpha \cdot |M_{best} - x(t)| \cdot \ln\left(\frac{1}{\mu}\right) \quad (12)$$

$$x(t+1) = P(t) - \left(\frac{2}{\zeta}\right) \cdot |M_{best} - x(t)| \cdot \ln\left(\frac{\Delta\theta}{2}\right) \quad (16)$$

$$x(t+1) = P(t) + \left(\frac{2}{\zeta}\right) \cdot |M_{best} - x(t)| \cdot \ln\left(\frac{\Delta\theta}{2}\right) \quad (17)$$

|     |                                                     |                                    |
|-----|-----------------------------------------------------|------------------------------------|
| $M$ | $M_{best} = \frac{\sum_{i=1}^M P(t)}{M} \quad (10)$ | represents the number of particles |
|-----|-----------------------------------------------------|------------------------------------|

|        |                                                     |                                                            |
|--------|-----------------------------------------------------|------------------------------------------------------------|
| $P(t)$ | $M_{best} = \frac{\sum_{i=1}^M P(t)}{M} \quad (10)$ | represents the position of the particle $P_{id}$ at time t |
|--------|-----------------------------------------------------|------------------------------------------------------------|

|     |                                                                                              |                                             |
|-----|----------------------------------------------------------------------------------------------|---------------------------------------------|
| $x$ | $x(t+1) = P - \alpha \cdot  M_{best} - x(t)  \cdot \ln\left(\frac{1}{\mu}\right) \quad (11)$ | the wormhole measure of hyperbolic path $x$ |
|-----|----------------------------------------------------------------------------------------------|---------------------------------------------|

$$x(t+1) = P + \alpha \cdot |M_{best} - x(t)| \cdot \ln\left(\frac{1}{\mu}\right) \quad (12)$$


---

---

|          |                                                                                                                                    |                                                                                                                                   |
|----------|------------------------------------------------------------------------------------------------------------------------------------|-----------------------------------------------------------------------------------------------------------------------------------|
|          | $x(t + 1) = P(t) - \left(\frac{2}{\zeta}\right) \cdot  M_{best} - x(t) $ $\cdot \ln\left(\frac{\Delta\theta}{2}\right) \quad (16)$ |                                                                                                                                   |
|          | $x(t + 1) = P(t) + (2/\zeta) \cdot  M_{best} - x(t) $ $\cdot \ln\left(\frac{\Delta\theta}{2}\right) \quad (17)$                    |                                                                                                                                   |
| $\alpha$ | $x(t + 1) = P - \alpha \cdot  M_{best} - x(t) $ $\cdot \ln\left(\frac{1}{\mu}\right) \quad (11)$                                   | the expansion coefficient of the speed in controlling convergence, and it represents the maximum number of iterations convergence |
|          | $x(t + 1) = P + \alpha \cdot  M_{best} - x(t) $ $\cdot \ln\left(\frac{1}{\mu}\right) \quad (12)$                                   |                                                                                                                                   |
| $\mu$    | $x(t + 1) = P - \alpha \cdot  M_{best} - x(t) $ $\cdot \ln\left(\frac{1}{\mu}\right) \quad (11)$                                   | random digital                                                                                                                    |
|          | $x(t + 1) = P + \alpha \cdot  M_{best} - x(t) $ $\cdot \ln\left(\frac{1}{\mu}\right) \quad (12)$                                   |                                                                                                                                   |
| $x(t)$   | $x(t + 1) = P - \alpha \cdot  M_{best} - x(t) $ $\cdot \ln\left(\frac{1}{\mu}\right) \quad (11)$                                   | representing the next step for the iteration variable wormhole particle                                                           |
|          | $x(t + 1) = P + \alpha \cdot  M_{best} - x(t) $ $\cdot \ln\left(\frac{1}{\mu}\right) \quad (12)$                                   |                                                                                                                                   |
|          | $x(t + 1) = P(t) - \left(\frac{2}{\zeta}\right) \cdot  M_{best} - x(t) $ $\cdot \ln\left(\frac{\Delta\theta}{2}\right) \quad (16)$ |                                                                                                                                   |
|          | $x(t + 1) = P(t) + (2/\zeta) \cdot  M_{best} - x(t) $ $\cdot \ln\left(\frac{\Delta\theta}{2}\right) \quad (17)$                    |                                                                                                                                   |
| $P(t)$   | $x(t + 1) = P(t) - \left(\frac{2}{\zeta}\right) \cdot  M_{best} - x(t) $ $\cdot \ln\left(\frac{\Delta\theta}{2}\right) \quad (16)$ | the position of the particle $P_{id}$ at time t                                                                                   |

---

---


$$x(t+1) = P(t) + (2/\zeta) \cdot |M_{\text{best}} - x(t)| \cdot \ln\left(\frac{\Delta\theta}{2}\right) \quad (17)$$

$\rho(r)$   $\rho(r) \approx e^{-\frac{\zeta r}{2}}$  (14) the node probability distribution of the wormhole path measure

$X_{iw}$   $X_{iw} = P_{id} + \left(\frac{2}{\zeta}\right) \ln\left(\frac{\Delta\theta}{2}\right)$  (15) the position of a particle in the wormhole path measure

$\Delta f$   $\Delta f = |f_{ij} - f_{kl}| \leq TH_f$  and  $\Delta d = \sqrt{(i-k)^2 + (j-l)^2} \leq TH_o$  (18) the gray value difference of the two particle

$$\Delta f = |f_{ij} - \bar{f}| \leq TH_f \text{ and } \sqrt{(i-k)^2 + (j-l)^2} \leq TH_o \quad (19)$$

$f_{ij}$   $\Delta f = |f_{ij} - f_{kl}| \leq TH_f$  and  $\Delta d = \sqrt{(i-k)^2 + (j-l)^2} \leq TH_o$  (18) the gray seed particle value

$$\Delta f = |f_{ij} - \bar{f}| \leq TH_f \text{ and } \sqrt{(i-k)^2 + (j-l)^2} \leq TH_o \quad (19)$$

$f_{kl}$   $\Delta f = |f_{ij} - f_{kl}| \leq TH_f$  and  $\Delta d = \sqrt{(i-k)^2 + (j-l)^2} \leq TH_o$  (18) the other gray seed particle value

$$\Delta f = |f_{ij} - \bar{f}| \leq TH_f \text{ and } \sqrt{(i-k)^2 + (j-l)^2} \leq TH_o \quad (19)$$

$TH_f$   $\Delta f = |f_{ij} - f_{kl}| \leq TH_f$  and  $\Delta d = \sqrt{(i-k)^2 + (j-l)^2} \leq TH_o$  (18) the pixel gray value difference

$$\Delta f = |f_{ij} - \bar{f}| \leq TH_f \text{ and } \sqrt{(i-k)^2 + (j-l)^2} \leq TH_o \quad (19)$$

$TH_o$   $\Delta f = |f_{ij} - f_{kl}| \leq TH_f$  and  $\Delta d = \sqrt{(i-k)^2 + (j-l)^2} \leq TH_o$  (18) the threshold values of position variance

$$\Delta f = |f_{ij} - \bar{f}| \leq TH_f \text{ and } \sqrt{(i-k)^2 + (j-l)^2} \leq TH_o \quad (19)$$


---

---

$\Delta d$

$$\Delta f = |f_{ij} - f_{kl}| \leq TH_f \text{ and } \Delta d = \sqrt{(i-k)^2 + (j-l)^2} \leq TH_o \quad (18)$$

the root mean square difference of the two particles position

$$\Delta f = |f_{ij} - \bar{f}| \leq TH_f \text{ and } \Delta d = \sqrt{(i-k)^2 + (j-l)^2} \leq TH_o \quad (19)$$

$\bar{f}$

$$\Delta f = |f_{ij} - f_{kl}| \leq TH_f \text{ and } \Delta d = \sqrt{(i-k)^2 + (j-l)^2} \leq TH_o \quad (18)$$

the average gray value of the particles in the seed area

$$\Delta f = |f_{ij} - \bar{f}| \leq TH_f \text{ and } \Delta d = \sqrt{(i-k)^2 + (j-l)^2} \leq TH_o \quad (19)$$

---
